# Supplementary material
Source: MDPI journal article supplement (https://www.mdpi.com/2073-4433/14/2/301)
Supplement: s1 [file s1]

Supplementary Materials for the paper of I.S. Andreeva et al.  
“Composition and concentration of biogenic components of the aerosols collected over  
Vasyugan marshes and Karakan pine forest at altitudes from 500 to 7000 m”

**Captions for figures and tables.**

**Figure S1.** Backward trajectories of the movement of air masses, from which sampling was carried out over the Vasyugan marshes at altitudes of 7000 and 5500 m.

**Figure S2.** Backward trajectories of the movement of air masses, from which sampling was carried out over the Vasyugan marshes at altitudes of 4000 and 3000 m.

**Figure S3.** Backward trajectories of the movement of air masses, from which sampling was carried out over the Vasyugan marshes at altitudes of 2000 and 1500 m.

**Figure. S4.** Backward trajectories of the movement of air masses, from which sampling was carried out over the Vasyugan marshes at altitudes of 1000 and 500 m.

**Figure S5.** Backward trajectories of the movement of air masses, from which sampling was carried out over the Karakan pine forest at altitudes of 7000 and 5500 m.

**Figure S6.** Backward trajectories of the movement of air masses, from which sampling was carried out over the Karakan pine forest at altitudes of 4000 and 3000 m.

**Figure S7.** Backward trajectories of the movement of air masses, from which sampling was carried out over the Karakan pine forest at altitudes of 2000 and 1500 m.

**Figure S8.** Backward trajectories of the movement of air masses, from which sampling was carried out over the Karakan pine forest at altitudes of 1000 and 500 m.

**Figure S9.** Fungal colonies on Sabouraud's medium, detected by cultivating Karakan and Vasyugan regions aerosol samples at a temperature 6-9 °C.

**Table S1.** Information about the culture media used.

**Table S2.** Growth of cultures of isolated fungi at different cultivation temperatures.

**Table S3.** Sequencing raw results for some isolates.

**Table S4.** The sensitivity of cultures to antimycotics was considered in accordance with the instructions for using discs with antifungal drugs of the Pasteur Research Institute of Epidemiology and Microbiology.

NOAA HYSPLIT MODEL  
Backward trajectories ending at 0900 UTC 14 Sep 18  
GDAS Meteorological Data

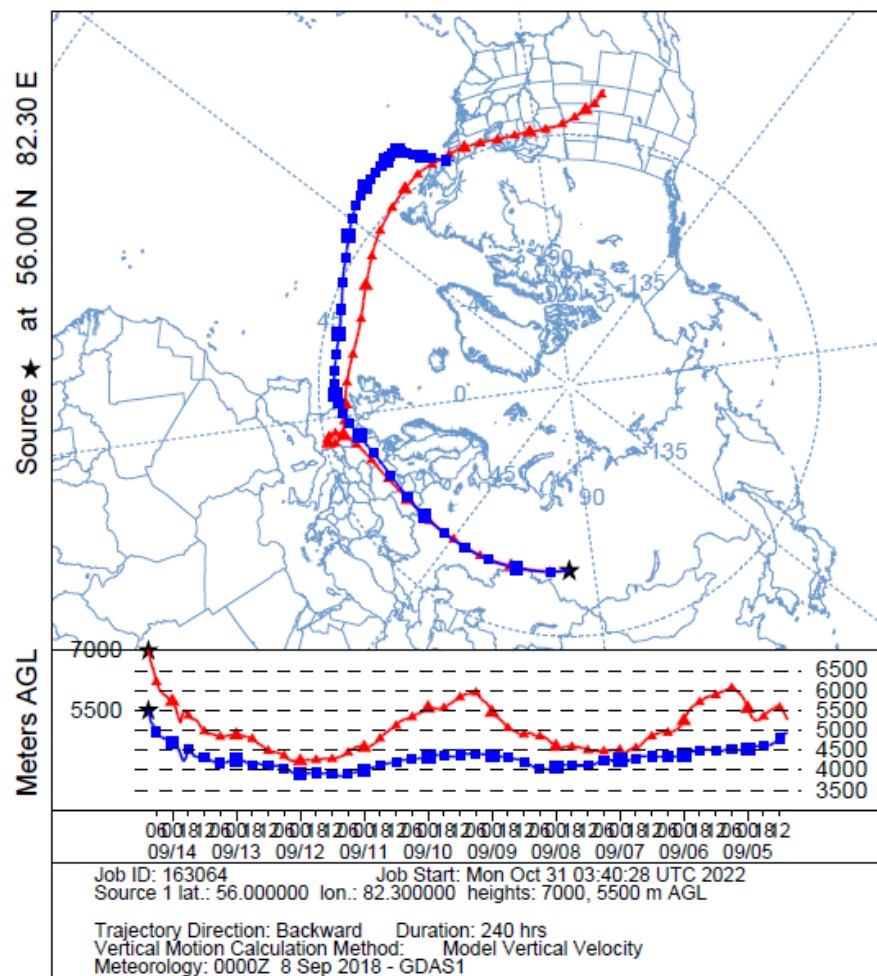

Figure S1.

NOAA HYSPLIT MODEL  
Backward trajectories ending at 0900 UTC 14 Sep 18  
GDAS Meteorological Data

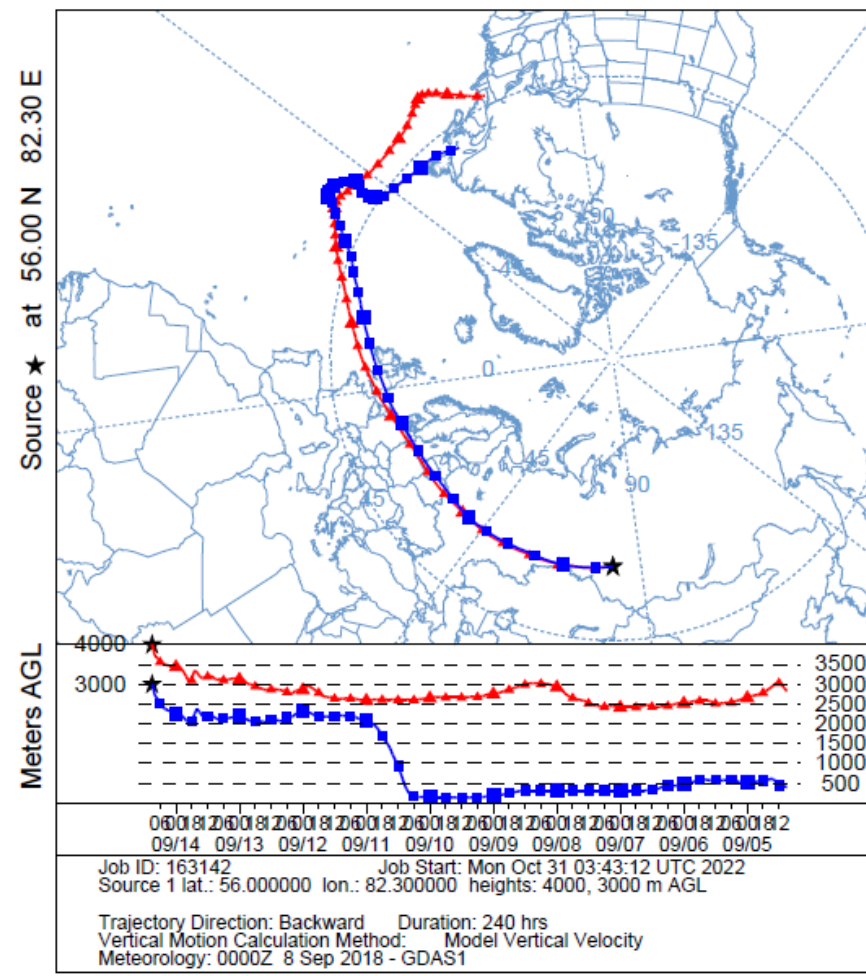

Figure S2.

NOAA HYSPLIT MODEL  
Backward trajectories ending at 0900 UTC 14 Sep 18  
GDAS Meteorological Data

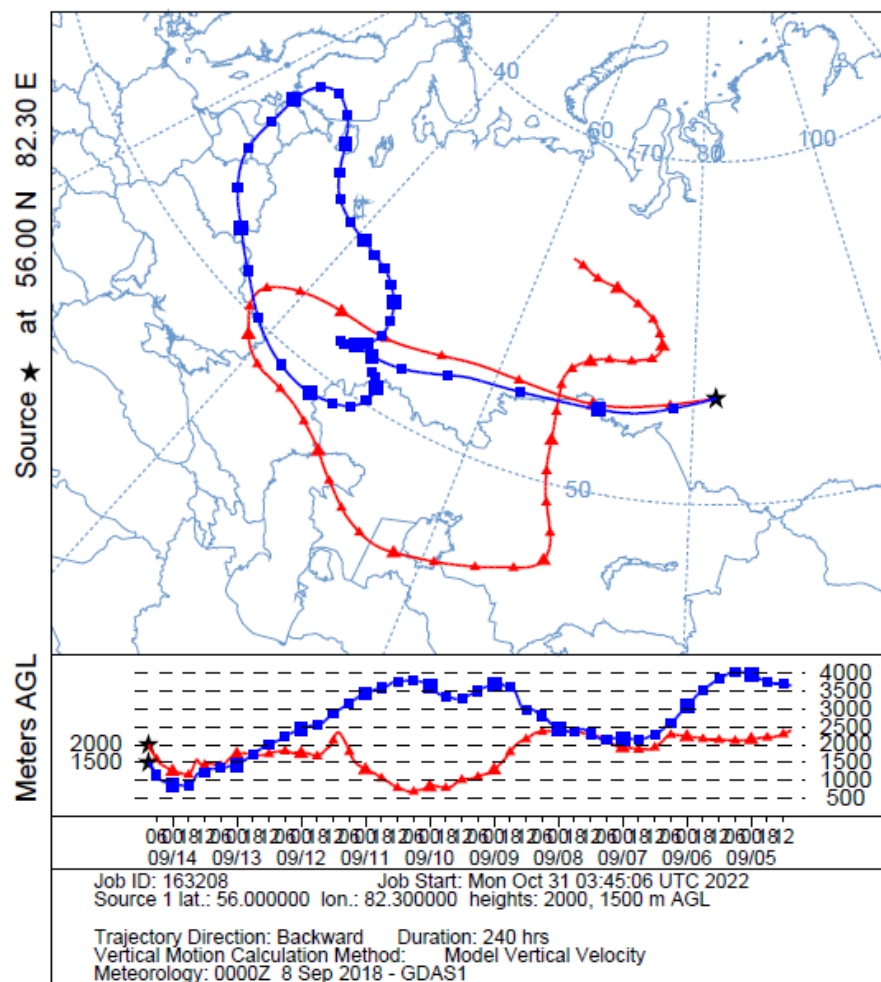

Figure S3.

NOAA HYSPLIT MODEL  
Backward trajectories ending at 1000 UTC 14 Sep 18  
GDAS Meteorological Data

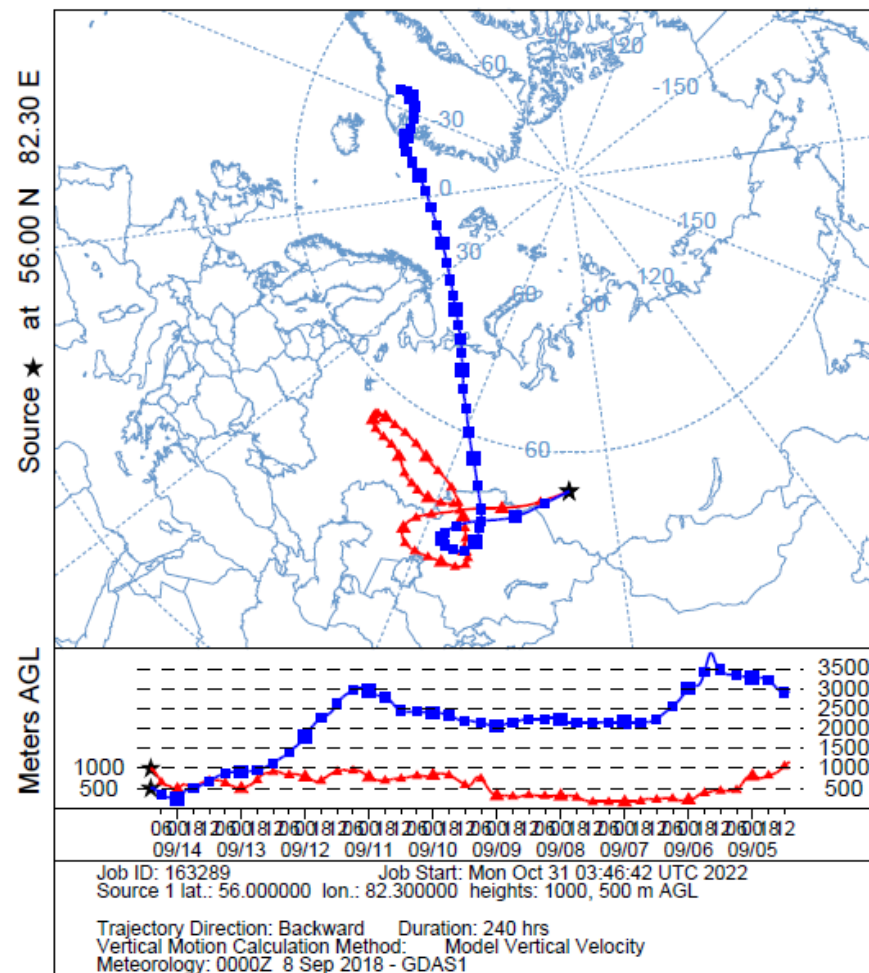

Figure S4.





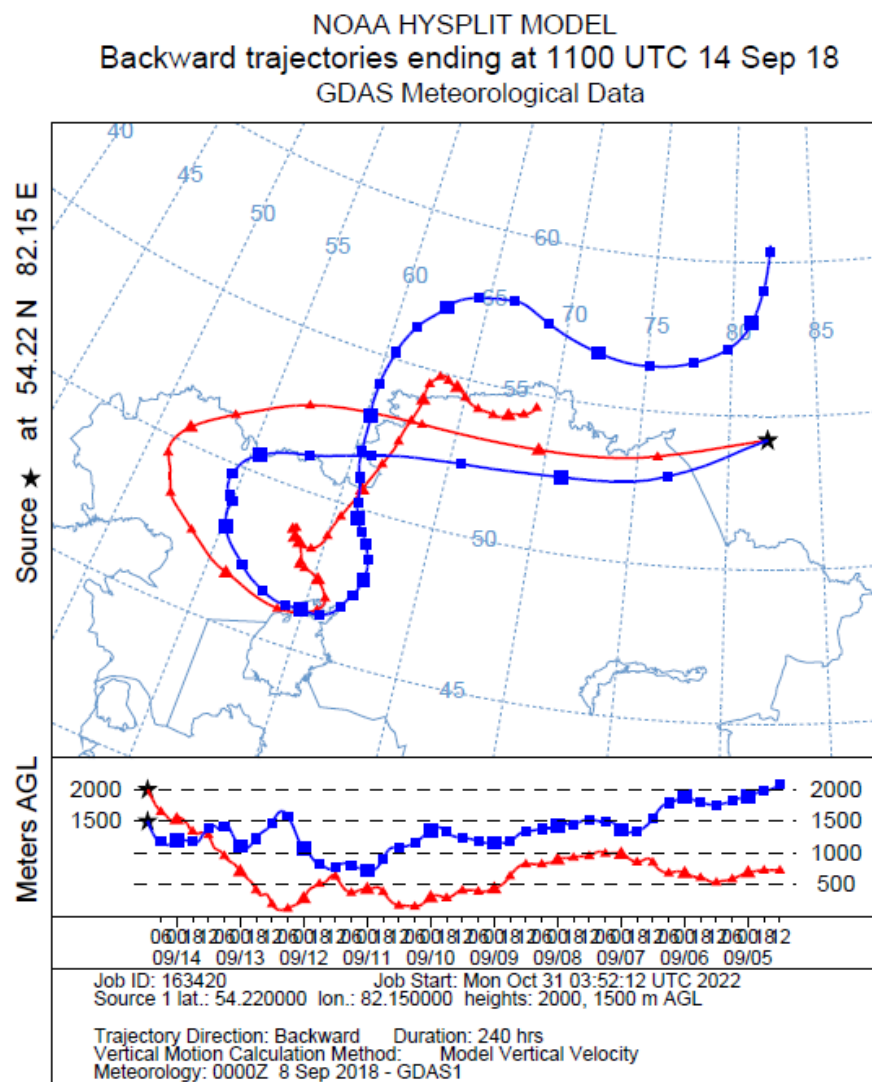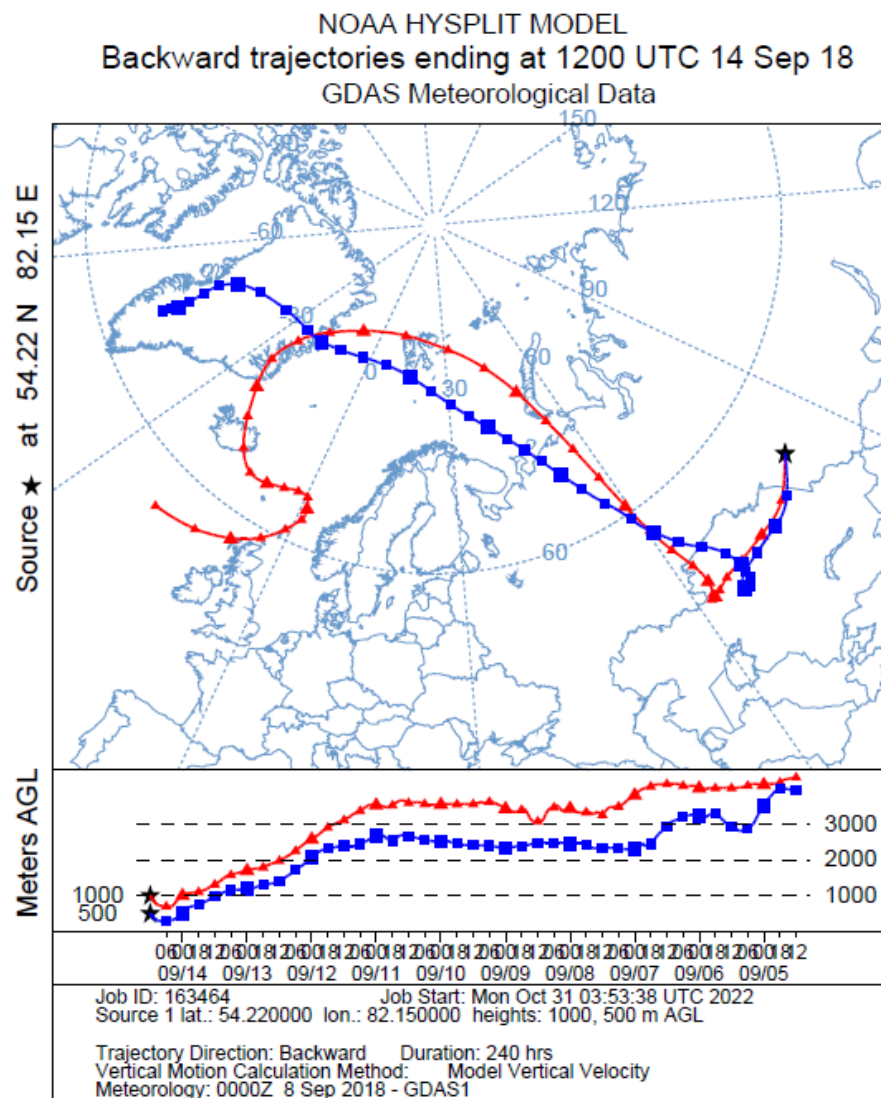

|                                                                                    |  |                                                                                                                                                                          |  |                                                                                     |  |
|------------------------------------------------------------------------------------|--|--------------------------------------------------------------------------------------------------------------------------------------------------------------------------|--|-------------------------------------------------------------------------------------|--|
| 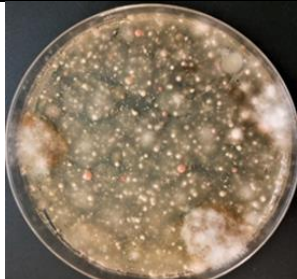  |  |                                                                                         |  |  |  |
| 1. Vasyugan area sample, h = 500 m: fungal colonies on Sabouraud's medium          |  | 2                                                                                                                                                                        |  | 3                                                                                   |  |
|                                                                                    |  | Vasyugan area sample, h = 1000 m: 2 – fungal colonies on Sabouraud's medium; 3 – <i>Aureobasidium</i> colonies.                                                          |  |                                                                                     |  |
|   |  |                                                                                         |  |  |  |
| 4. Karakan area sample, h = 500 m: fungal colonies on Sabouraud's medium           |  | 5                                                                                                                                                                        |  | 6                                                                                   |  |
|                                                                                    |  | Karakan area sample, h = 1000 m: 5 – fungal colonies on Sabouraud's medium; 6 – <i>Aureobasidium</i> colonies.                                                           |  |                                                                                     |  |
|  |  | 7. Karakan area sample, h = 200 - 500 m: colonies of mold fungi and yeast isolated during the cultivation of aerosol samples from 09/08/2022 at a temperature of 6-9 °C. |  |                                                                                     |  |

**Figure S9.**

**Table S1.** Information about the culture media used.

| The names of culture media                                                                                        | Culture media compositions                                                                                                                                                                                                                                                                                                                                                                                                                                                                                                                                                                                                             |
|-------------------------------------------------------------------------------------------------------------------|----------------------------------------------------------------------------------------------------------------------------------------------------------------------------------------------------------------------------------------------------------------------------------------------------------------------------------------------------------------------------------------------------------------------------------------------------------------------------------------------------------------------------------------------------------------------------------------------------------------------------------------|
| Nutrient medium based on fishmeal hydrolysate (HFM) for the quantitative determination of microbial contamination | Pancreatic hydrolysate of fishmeal - 12.0; enzymatic peptone - 12.0; NaCl - 6.0; microbiological agar - $10 \pm 2$ ; distilled water up to 1 liter; pH = 7.1 - 7.5.                                                                                                                                                                                                                                                                                                                                                                                                                                                                    |
| Starch-ammonia agar (SAA) - synthetic medium, solid, elective. Used to grow amylolytics, including actinomycetes. | (g/l): starch - 10, $(\text{NH}_4)_2\text{SO}_4$ - 2, $\text{K}_2\text{HPO}_4$ - 1, $\text{MgSO}_4$ - 1, $\text{CaCO}_3$ - 3, agar-agar - 20, distilled water - 1000 ml. Agar is dissolved in 300 ml of water. Separately dissolve the starch in 100 ml of water. Salts are dissolved in the remaining 600 ml of water, heated to a boil, and starch is poured into the boiling solution with continuous stirring, then water with agar is added and sterilized in an autoclave. pH 7.0-7.2.                                                                                                                                           |
| Sabouraud's medium                                                                                                | (g/l): peptone, 10; maltose 40; agar - 20; distilled water up to 1 liter; pH = 5.4.                                                                                                                                                                                                                                                                                                                                                                                                                                                                                                                                                    |
| Soil agar                                                                                                         | (g/l): Air-dry soil taken from the upper horizon of the studied soil or any soil rich in organic matter (peat, chernozem) is freed from plant residues and other inclusions, crushed in a mortar, placed in a flask and poured with distilled water into ratio 1:9. 2% agar is added to the resulting suspension and sterilized twice at $120 \pm 2$ °C for 1 hour. The medium is cooled to 50-60 °C and sterile yeast autolysate is added to it (1 ml per 100 ml of medium). The prepared medium is thoroughly mixed and poured into sterile Petri dishes (the medium should get into the cup along with soil particles). pH 7.0-7.2. |

**Table S2.** Growth of cultures of isolated fungi at different cultivation temperatures.

| Strain   | 6-10 °C | 18 °C | 24 °C | 30 °C | 37 °C | 50 °C |
|----------|---------|-------|-------|-------|-------|-------|
| Dr 9-1   | ++      | +++   | +++   | +     | -     | -     |
| Dr 9-5   | +       | +++   | +++   | ++    | ±     | -     |
| Dr 9-6   | +       | +++   | +++   | ++    | ±     | -     |
| Dr 9-25  | ++      | +++   | +++   | ±     | -     | -     |
| Dr 9-26  | ++      | +++   | +++   | +     | -     | -     |
| Dr 9-30  | ++      | +++   | +++   | ±     | -     | -     |
| Dr 10-13 | +       | +++   | +++   | +     | -     | -     |
| Dr 10-15 | ++      | +++   | +++   | +     | -     | -     |
| Dr 10-16 | +       | +     | ±     | ±     | ±     | -     |
| Dr 11-7  | +       | +++   | +++   | ±     | -     | -     |
| Dr 11-8  | ++      | +++   | +++   | +     | -     | -     |
| Dr 11-12 | +       | +++   | +++   | +     | -     | -     |
| Dr 11-13 | +       | +++   | +++   | +     | -     | -     |
| MR 12    | ++      | +++   | +++   | +     | -     | -     |
| MR 14    | +       | +++   | +++   | ++    | -     | -     |
| MR 58    | +       | ++    | +++   | +++   | ++    | -     |
| MR 135   | +       | +++   | +++   | ±     | -     | -     |
| MR 160   | +       | +++   | +++   | ±     | -     | -     |
| MR 166   | +       | ±     | -     | -     | -     | -     |
| MR 189   | +       | +++   | +++   | -     | -     | -     |

Here “+++” means very good microorganism culture growth, “++” - good microorganism culture growth, “+” - moderate microorganism culture growth, “±” - weak microorganism culture growth, and “-” – no growth at all.



**Table S3.** Sequencing raw results for some isolates.

| Strain                           | Sequence data                                                                                                                                                                                                                                                                                                                                                                                                                                                                                                                                                                                                               |
|----------------------------------|-----------------------------------------------------------------------------------------------------------------------------------------------------------------------------------------------------------------------------------------------------------------------------------------------------------------------------------------------------------------------------------------------------------------------------------------------------------------------------------------------------------------------------------------------------------------------------------------------------------------------------|
| MR 14-ITS.TXT                    | CTACTGATCCGAGGTCACCTAGAAAATAAAGGTTTCAGTCGGCAGAGTTCTCTCCTTTGACAGACGTTTGAATAA<br>AATTCTACTACGCCTAAAGCCGGAGTGGCCTCGCCGAGGTCTTTAAGGCGCGCCCACTAAGGACGACGCCCAAT<br>ACCAAGCATAGCTTGAGTGGTGTAAATGACGCTCGAACAGGCATGCCCTCGGAATACCAAGGGGCGCAATGTGC<br>GTTCAAAGATTTCGATGATTCACTGAATTCTGCAATTCACATTACTTATCGCATTTTCGCTGCGTTCTTCATCGATGC<br>GAGAACCAAGAGATCCGTTGTTGAAAGTTTTGATTTATTCAAATTTTAACTCAGACGACCGGTTAAATAACAAG<br>AGTTTTGGTTTAACTCTGGCGGGCGCTCGCCTGGGACGAATCCCCAGCGGCTCGAGACCGAGCGGTCCCGCCAAA<br>GCAACAAGGTAGTTTTAAACAACAAGGGTTGGAGGTGCGGCGCTGAGCACCTTACTCTTTAATGATCCTTCCGC<br>AGGTTACCTACGGAACCTTGTACGACTTTTACTTCTCTAAATGACCAAG   |
| MR 135-ITS<br>VM-1688_MR-135_ITS | ACTACTGATTGAGGCCAGATCATGAATATGTGGGGTTATCAGCCACCCAGAAGGATGAAACGTATTACATCCAAG<br>GTGCTTATGTCTTTAAGGCGAGCCTTTAGCAAGGCAACACCCAATACACCACCGCTCAGGCAAAAACCCAAGTG<br>GGGTGAGGTTTCATGACACTCAAACAGGCATGCCCTTCGGAATACCAAAGGGCGCAAGGTGCGTTCAAAGATTC<br>GATGATTCACTGAATTCTGCAATTCACATTACTTATCGCATTTTCGCTGCGTTCTTCATCGATGCGAGAGCCAAGAG<br>ATCCGTTGTTAAAAGTTTTGTTTTGTTATGATATTACATTCATTACTAACAGTTTGTGATGGCCGAAGCCACAGTT<br>CACGGTGTGATGGAACCCCTCTTTCGCAAGAGAGCAGATCTAACCAATGATTTGCATCAGAGGGGACTA<br>TTAATGATCCTTCCGAGGTTACCTACGGAACCTTGTATGACTTTTACTTCTCTAAATGACCAAGA                                                                      |
| Dr 11-7-ITS.TXT                  | CTACTGATTGAGGTCAGAGCATAAAATAATGACCTTGCAGTTCGGGTTATGAGCAGTCGTCACACCTTGACCAGAC<br>GAACTTATTACGCTTAGCCGTGGATGTTATTACCACTAACTCTTTAAGGCGAGCCAGCGAACTGGCAGACACCC<br>AAGTCCAAGCCCAACACTGATCAGAAACCAGGAGGGGTTGATATTTTCATGACACTCAAACAGGCATGCCTTTCGG<br>AATACCAAAAGGCGCAAGGTGCGTTCAAAGATTTCGATGATTCACTGAATTCTGCAATTCACATTACTTATCGCATT<br>TCGCTGCGTTCTTCATCGATGCGAGAGCCAAGAGATCCGTTGTTAAAAGTTTTATATGATTAATATAGGTTACGTT<br>CATTACACAGATGTTTGTATAAGAATCGGTCCGAAGACCAACAGTTCACAGAGGTAGAAGATTATAGTTATTAAG<br>ACCCGGAGGTCAATCACTAATGATCCTTCCGAGGTTACCTACGGAACCTTGTACGACTTTTACTTCTCTAAAT<br>GGACCAAGA                                        |
| Dr 11-12-ITS.TXT                 | CTACTGATCCGAGGTCACCTAGAAAATAAAGGTTTCAGTCGGCAGAGTTCTCTCCTTTGACAGACGTTTGAATAAA<br>TTCTACTACGCCTAAAGCCGGAGTGGCCTCGCCGAGGTCTTTAAGGCGCGCCCACTAAGGACGACGCCCAATACC<br>AAGCATAGCTTGAGTGGTGTAAATGACGCTCGAACAGGCATGCCCTCGGAATACCAAGGGGCGCAATGTGCGTTCA<br>AAGATTTCGATGATTCACTGAATTCTGCAATTCACATTACTTATCGCATTTTCGCTGCGTTCTTCATCGATGCGAGAACCA<br>AGAGATCCGTTGTTGAAAGTTTTGATTTATTCAAATTTTAACTCAGACGACCGGTTAAATAACAAGAGTTTGGTTTAA<br>CTCTGGCGGGCGCTCGCCTGGGACGAATCCCCAGCGGCTCGAGACCGAGCGGTCCCGCCAAAGCAACAAGGTAGTT<br>TTAAACAACAAGGGTTGGAGGTGCGGCGCTGAGCACCTTACTCTTTAATGATCCTTCCGAGGTTACCTACGAAA<br>CCTTGTTACGACTTTTACTTCTCTAAATGACCAAGA    |
| Dr 11-13-ITS.TXT                 | CTACTGATTGAGGCAGATCATGAGTTATGTGGGGTTATCAGCCACTCGTAAGGATGAAACGTATTACATCCAAAGTT<br>GCTTATGCTTTTAAAGGTGAGCCAGTAACGGCAGACACCCAATCCACCACCGCTCGGGCAAAAACCCAAGTGGGGTGA<br>GGTTTCATGACACTCAAACAGGCATGCCCTTCGGAATACCAAAGGGCGCAAGGTGCGTTCAAAGATTTCGATGATTCA<br>CTGAATTCTGCAATTCACATTACTTATCGCATTTTCGCTGCGTTCTTCATCGATGCGAGAGCCAAGAGATCCGTTGTTAAA<br>AGTTTTATGTTTGTATGATGTTACATTCATTACTAACAGTTTGTGTAATGGCCGAAGCCACAGTTCACGGTGTGTGAG<br>ATAAGGTCGACTCCGAAGAGACCGACACAAACCCTACCAGTCCAAAGACTTCGAGGGGCATCATTAAATGATC<br>CTTCCGAGGTTACCTACGGAACCTTGTATGACTTTTACTTCTCTAAATGACCAAGA                                                           |
| Dr 9-1-ITS.TXT                   | TCTACTGATCGAGGTCACCTAGAAAATAAAGGTTTCAGTCGGCAGAGTTCTCTCCTTTGACAGACGTTTGAATAAA<br>TTCTACTACGCCTAAAGCCGGAGTGGCCTCGCCGAGGTCTTTAAGGCGCGCCCACTAAGGACGACGCCCAATACC<br>AAGCATAGCTTGAGTGGTGTAAATGACGCTCGAACAGGCATGCCCTCGGAATACCAAGGGGCGCAATGTGCGTTCA<br>AAGATTTCGATGATTCACTGAATTCTGCAATTCACATTACTTATCGCATTTTCGCTGCGTTCTTCATCGATGCGAGAACCA<br>AGAGATCCGTTGTTGAAAGTTTTGATTTATTCAAATTTTAACTCAGACGACCGGTTAAATAACAAGAGTTTGGTTTA<br>ACTCTGGCGGGCGCTCGCCTGGGACGAATCCCCAGCGGCTCGAGACCGAGCGGTCCCGCCAAAGCAACAAGGTAGT<br>TTTAACAACAAGGGTTGGAGGTGCGGCGCTGAGCACCTTACTCTTTAATGATCCTTCCGAGGTTACCTACGGA<br>AACCTTGTTACGACTTTTACTTCTCTAAATGACCAAGA    |
| Dr 9-5-ITS.TXT                   | CCTACTGATCCGAGGTCACCTAGAAAATAAAGGTTTCAGTCGGCAGAGTTCTCTCCTTTGACAGACGTTTGAATAAA<br>TTCTACTACGCCTAAAGCCGGAGTGGCCTCGCCGAGGTCTTTAAGGCGCGCCCACTAAGGACGACGCCCAATACC<br>AAGCATAGCTTGAGTGGTGTAAATGACGCTCGAACAGGCATGCCCTCGGAATACCAAGGGGCGCAATGTGCGTTTC<br>AAAGATTTCGATGATTCACTGAATTCTGCAATTCACATTACTTATCGCATTTTCGCTGCGTTCTTCATCGATGCGAGAAC<br>CAAGAGATCCGTTGTTGAAAGTTTTGATTTATTCAAATTTTAACTCAGACGACCGGTTAAATAACAAGAGTTTGGT<br>TTAACTCTGGCGGGCGCTCGCCTGGGACGAATCCCCAGCGGCTCGAGACCGAGCGGTCCCGCCAAAGCAACAAGGT<br>AGTTTTTAACAACAAGGGTTGGAGGTGCGGCGCTGAGCACCTTACTCTTTAATGATCCTTCCGAGGTTACCTACG<br>GAAACCTTGTTACGACTTTTACTTCTCTAAATGACCAAGA |

|                 |                                                                                                                                                                                                                                                                                                                                                                                                                                                                                                                                                                                                                         |
|-----------------|-------------------------------------------------------------------------------------------------------------------------------------------------------------------------------------------------------------------------------------------------------------------------------------------------------------------------------------------------------------------------------------------------------------------------------------------------------------------------------------------------------------------------------------------------------------------------------------------------------------------------|
| Dr 9-6-ITS.TXT  | CTACTGATCCGAGGTACCTAGAAAATAAAGGTTTCAGTCGGCAGAGTTCCTCTCCTTTGACAGAC<br>GTTTCAATAAATTCTACTACGCCTAAAGCCGGAGTGGCCTCGCCGAGGTCTTTAAGGCGCGCCCAA<br>CTAAGGACGACGCCAATACCAAGCATAGCTTGAGTGGTGAATGACGCTCGAACAGGCATGCCC<br>CTCGGAATACCAAGGGGCGCAATGTGCGTTCAAAGATTGATGATTCACTGAATTCTGCAATTCACA<br>TTACTTATCGCATTTGCTGCGTTCTTCATCGATGCGAGAACCAAGAGATCCGTTGTTGAAAGTTTTG<br>ATTTATTCAAATTTTAACTCAGACGACCGGTTAAATAACAAGAGTTTGTTTAACTCTGGCGGGCGC<br>TCGCCTGGGACGAATCCCCAGCGGCTCGAGACCGAGCGGTCCCGCCAAAGCAACAAGGTAGTTTTA<br>ACAACAAAGGTTGGAGGTGCGGCGCTGAGCACCTTACTCTTTAATGATCCTTCCGCAGGTTACC<br>TACGGAAACCTTGTTACGACTTTTACTTCTCTAAATGACCAAGA |
| Dr 9-25-ITS.TXT | CTACTGATTGAGGTCAAGTCAAAAGTGCAGATGGCAGGTTATGAGCGGTATCACCACAAGGAGA<br>GACGAACTTATTACGTCTAACTGATGCGGGATGTTCCACTAAGTCATTTGAGGTGAGCCATTGCT<br>GGCAGACACCCATGTCCAAGCCCAACCAGGTCAAAAACCTAGAAGGGTTGAGATTTTCATGACACTCAA<br>ACAGGCATGCCTTTTCGGAATACCAAAGGCGCAAGGTGCGTTCAAAGATTGATGATTCACTGAATTC<br>TGCAATTCACATTACTTATCGCATTTGCTGCGTTCTTCATCGATGCGAGAGCCAAGAGATCCGTTGTT<br>GAAAGTTTTGTTTCGTTAAGATACTTTACGTTTCGTTACACTGATGTTTGATTGTAGACCCAGAGGTCCA<br>ACAGTTCACAGAGGTGGTAGAATCTGATAAGGTCTTTGACCAATCAATAATGATCCTTCCGCAGGTTT<br>ACCTACGGAAACCTTGTTACGACTTTTACTTCTCTAAATGGACCAAGA                                                     |
| Dr 9-26-ITS.TXT | CTACTGATCGAGGTACCTAGAAAATAAAGGTTTCAGTCGGCAGAGTTCCTCTCCTTTGACAGACGTTTCAATAA<br>ATTCTACTACGCCTAAAGCCGGAGTGGCCTCGCCGAGGTCTTTAAGGCGCGCCCACTAAGGACGACGCCAATA<br>CCAAGCATAGCTTGAGTGGTGAATGACGCTCGAACAGGCATGCCCTCGGAATACCAAGGGGCGCAATGTGCG<br>TTCAAAGATTGATGATTCACTGAATTCTGCAATTCACATTACTTATCGCATTTGCTGCGTTCTTCATCGATGCGA<br>GAACCAAGAGATCCGTTGTTGAAAGTTTTGATTTATTCAAATTTTAACTCAGACGACCGGTTAAATAACAAGAG<br>TTTGTTTAACTCTGGCGGGCGCTCGCCTGGGACGAATCCCCAGCGGCTCGAGACCGAGCGGTCCCGCCAAAGC<br>AACAAGGTAGTTTTAACAACAAAGGTTGGAGGTGCGGCGCTGAGCACCTTACTCTTTAATGATCCTTCCGCA<br>GGTTCACCTACGGAAACCTTGTTACGACTTTTACTTCTCTAAATGACCAAGA       |
| Dr 9-30-ITS     | GCATCGATGAAGAACGCAGCGAAATGCGATAAGTAATGTGAATTGCAGAATTCAGTGAATCATCGAATCTTTGA<br>ACGCACATTGCGCCCTTGGTATTCCGAGGGGCATGCCTGTTGAGCGTCATTACACCACTCAAGCTATGCTTGG<br>TATTGGGTGTCGTCCTAGTTGGGCGCGCCTTAAAGACCTCGGCGAGGCCCTCCCGGCTTTAGGCGTAGTAGAAT<br>TTATTGAACGTCTGTCAAAGGAGAGGAACTCTGCCGACTGAAACCTTTATTTTACAGGTTGACCTCGGATCAGG<br>TAGGGGATACC                                                                                                                                                                                                                                                                                      |
| Dr 10-13-ITS    | CTTGGTCATTTAGAGGAAGTAAAAGTCATAACAAGGTTTCCGTAGGTGAACCTGCGGAAGGATCATTAAATGATGCCCTCG<br>AAGTCTTTGGACTGGTAGGGTTTGTGTCGGTCTCTTCGAGTCGACCTTATCTCACACACCGTGAACCTGTGGCTTCGGCC<br>ATTTACACAACTGTTAGTAATGAATGAACATCATAACAAACATAAACTTTTAAACACGGATCTCTTGCTCTCGCAT<br>CGATGAAGAACGCAGCGAAATGCGATAAGTAATGTGAATTGCAGAATTCAGTGAATCATCGAATCTTTGAACGCACCTTG<br>CGCCCTTTGGTATTCGAAGGGCATGCCTGTTGAGTGTGATGAACCTCACCCACTTGGGTTTTTGGCCGAGCGGTGG<br>TGGATTGGGTGTCGCGTTACTGGCTCACCTTAAAGCATAAGCAACTTTGGATGTAATACGTTTCATCCTTACGAGTG<br>GCTGATAACCCACATAACTCATGATCTGGCCTCAAATCAGGTAGGGCTACC                                                       |
| Dr 10-15-ITS    | GCATCGATGAAGAACGCAGCGAAATGCGATAAGTAATGTGAATTGCAGAATTCAGTGAATCATCGAATCTTTGAACGCAC<br>ATTGCGCCCTTGGTATTCCGAGGGGCATGCCTGTTGAGCGTCATTACACCACTCAAGCTATGCTTGGTATTGGGCGTC<br>GTCCTTAGTTGGGCGCGCCTTAAAGACCTCGGCGAGGCCACTCCGGCTTTAGGCGTAGTAGAATTTATTGAACGTCTGT<br>CAAAGGAGAGGAACTCTGCCGACTGAAACCTTTATTTTCTAGGTTGACCTCGGATCAGGTAGGGATACCC                                                                                                                                                                                                                                                                                         |
| Dr 10-16M-ITS   | GCATCGATGAAGAACGCAGCGAAATGCGATAAGTAATGTGAATTGCAGAATTCAGTGAATCATCGAATCTTTGAACGCAC<br>ATTGCGCCCTTGGTATTCCGAGGGGCATGCCTGTTGAGCGTCATTACACCACTCAAGCTATGCTTGGTATTGGGCGTC<br>GTCCTTAGTTGGGCGCGCCTTAAAGACCTCGGCGAGGCCACTCCGGCTTTAGGCGTAGTAGAATTTATTGAACGTCTGT<br>CAAAGGAGAGGAACTCTGCCGACTGAAACCTTTATTTTCTAGGTTGACCTCGGATCAGGTAGGGATACCC                                                                                                                                                                                                                                                                                         |
| Dr 11-8-ITS     | GCATCGATGAAGAACGCAGCGAAATGCGATAAGTAATGTGAATTGCAGAATTCAGTGAATCATCGAATCTTTGAACGCAC<br>ATTGCGCCCTTGGTATTCCGAGGGGCATGCCTGTTGAGCGTCATTACACCACTCAAGCTATGCTTGGTATTGGGCGTC<br>GTCCTTAGTTGGGCGCGCCTTAAAGACCTCGGCGAGGCCACTCCGGCTTTAGGCGTAGTAGAATTTATTGAACGTCTGT<br>CAAAGGAGAGGAACTCTGCCGACTGAAACCTTTATTTTCTAGGTTGACCTCGGATCAGGTAGGATAC                                                                                                                                                                                                                                                                                            |
| MR 12-ITS       | GCATCGATGAAGAACGCAGCGAAATGCGATAAGTAATGTGAATTGCAGAATTCAGTGAATCATCGAATCTTTGAACGCAC<br>ATTGCGCCCTTGGTATTCCGAGGGGCATGCCTGTTGAGCGTCATTACACCACTCAAGCTATGCTTGGTATTGGGCGTC<br>GTCCTTAGTTGGGCGCGCCTTAAAGACCTCGGCGAGGCCACTCCGGCTTTAGGCGTAGTAGAATTTATTGAACGTCTGT<br>CAAAGGAGAGGAACTCTGCCGACTGAAACCTTTATTTTCTAGGTTGACCTCGGATCAGTAGA                                                                                                                                                                                                                                                                                                 |
| MR 58-ITS       | TCTTGGTCATTTAGAGGAAGTAAAAGTCGTAACAAGGTTTCCGTAGGTGAACCTGCGGAAGGATCATTACAGTATTTCTT<br>TGCCAGCGCTTAACTGCGCGGCGAAAAACCTTACACACAGTGCTTTTTGATACAGAACTCTTGCTTTGGTTTGGCCTAG<br>AGATAGGTTGGGCCAGAGGTTTAAACAAAACAAATTTAATTTTACAGTTAGTCAAATTTGAATTAATCTTCAAAA<br>CTTCAACAACGGATCTCTGGTTCTCGCATCGATGAAGAACGCAGCGAAATGCGATAAGTAATATGAATTGCAGATTTT                                                                                                                                                                                                                                                                                    |

|                |                                                                                                                                                                                                                                                                                                                                                                                                                                                                                                                                                                                                                                                                                       |
|----------------|---------------------------------------------------------------------------------------------------------------------------------------------------------------------------------------------------------------------------------------------------------------------------------------------------------------------------------------------------------------------------------------------------------------------------------------------------------------------------------------------------------------------------------------------------------------------------------------------------------------------------------------------------------------------------------------|
|                | CGTGAATCATCGAATCTTTGAACGCACATTGCGCCCTCTGGTATTCCAGAGGGCATGCCTGTTTGAGCGTCATTTCTCTC<br>TCAAACCCCGGGTTTGGTATTGAGTGATACTCTTAGTCGGACTAGGCGTTTGCTTGAAAAGTATTGGCATGGGTAGTAC<br>TAGATAGTGCTGTGACCTCTCAATGTATTAGGTTTATCCAACCTCGTTGAATGGTGTGGCGGGATATTTCTGGTATTGTT<br>GGCCCCGGCCTTACAACAACCAAACAAGTTTGACCTCAAATCAGGTAGGAATAC                                                                                                                                                                                                                                                                                                                                                                     |
| MR 160-<br>ITS | CTTGGTCATTTAGAGGAAGTAAAAGTCGTAACAAGGTTTCCGTAGGTGAACCTGCGGAAGGATCACTAAAGTAAACGCCC<br>TCCGGGGCTCTCTTTATTCACACACCCCTGTGCACCTTGGCCACCTGCCGCGCTTCACTGCGTTAGTAGGTGTGTCTTTA<br>TAATTATACCCATATACACAAGTCATTGAATGTAAAATCGTTATAAACTAATATAACTTTCAACAACGGATCTCTTGGTT<br>CTCGCATCGATGAAGAACGCAGCGAATTGCGATAAGTAATGTGAATTGCAGAATTCAGTGAATCATCGAATCTTTGAACG<br>CATCTTGCGCTCTTTGGTATTCCGAAGAGCATGCCTGTTTGAGTGTGCATGAAACTCTCACCTCCAGCCTTCTTTAATTAG<br>AGGTGTTGGGGCGTGGACGTGAGTGCTGCTGGTGCCTGGTTGCATCGGCTCACTTGAAATATGTTAGCTGACTCCTCTA<br>GAGGTGGTTCTACTCGACGTGATAAGATCTCCGTCGAGGACAGTGCAACTTGTTGTGCTGGCCGCTCCTAGCAGTTGACG<br>TCGCTTCTAATTAGCGCAGACTTCGAGTGCTGGCAACTTTTGACAACCTTGGCCTCAAATCAGGTAGGACTAC |
| MR 166-<br>ITS | CTTGGTCATTTAGAGGAAGTAAAAGTCGTAACAAGGTTTCCGTAGGTGAACCTGCGGAAGGATCACTAAAGTAAACGCCC<br>TCCGGGGCTCTCTTTATTCACACACCCCTGTGCACCTTGGCCACCTGCCGCGCTTAACTGCGTTAGTAGGTGTGTCTCTT<br>TATTTATACCCATATACACAAGTCATTGAATGTAAAATCGTTATAAACTAATATAACTTTCAACAACGGATCTCTTGGTT<br>CTCGCATCGATGAAGAACGCAGCGAATTGCGATAAGTAATGTGAATTGCAGAATTCAGTGAATCATCGAATCTTTGAACG<br>CATCTTGCGCTCTTTGGTATTCCGAAGAGCATGCCTGTTTGAGTGTGCATGAAACTCTCACCTCCAGCCTTCTTTAATTAG<br>AGGTGTTGGGGCGTGGACGTGAGTGCTGCTGGTGCCTGGTTGCATCGGCTCACTTGAAATACATTAGCTGAATCCTCTA<br>GAGGTGGTTCTACTCGACGTGATAAGATCTCCGTCGAGGACAGTGCAACTTGTTGTGCTGGCCGCCGCTAGCAGTTGATA<br>CGCTTCTAATTAGCGCAGACTTCGAGTGCTGGCAACTTTTGACAACCTTGGCCTCAAATCAGGTAGGACTAC  |
| MR 189-<br>ITS | CTTGGTCATTTAGAGGAAGTAAAAGTCGTAACAAGGTTTCCGTAGGTGAACCTGCGGAAGGATCATTAATGAATTTAGAT<br>TGAACCATAGGCGAAAAGCCAGTGTTCTCTTTTCATATCCATAACACCTGTGCACCTGTTGGATGCTTGCATCCACTTTTA<br>AACTAAACATTATTGTAACAAATGTAGTCTTATTATAACATAATAAACTTTCAACAACGGATCTCTTGGCTCTCGCATC<br>GATGAAGAACGCAGCGAAATGCGATAAGTAATGTGAATTGCAGAATTCAGTGAATCATCGAATCTTTGAACGCACCTTGC<br>GCTCCTTGGTATTCCGAGGAGCATGCCTGTTTGAGTGTGCATGAAACCCTCAAACCCAAGTTTGGATTTCGATCCATGCT<br>TGAGTTTGGATTGGATGTTTGCCGGTGATGAACCGACTCATCTTAAAAGTATTAGCTTGGATCTGTCTATATGACTGGT<br>TTGACTTGGCATAATAAGTATTTTGCTGAGGACATCTTCGGATGGCCAGGACCTAGACTACTGTCTGCTAACTAAACCAT<br>CACTTTAAGTGATCTTTGGATGTTACTCATTGTGTAACCTTGACATCTGGCCTCAAATCAAGTAGGACTAC    |

Four types of bases are found in a DNA molecule usually: letter “A” stands for adenine, letter “C” stands for cytosine, letter “G” stands for guanine, and letter “T” stands for thymine.

**Table S4.** The sensitivity of cultures to antimycotics was considered in accordance with the instructions for using discs with antifungal drugs of the Pasteur Research Institute of Epidemiology and Microbiology.

| No. | Name of discs with medicines | Diameters of colony growth suppression zones, mm |               |           |
|-----|------------------------------|--------------------------------------------------|---------------|-----------|
|     |                              | sustainable                                      | semisensitive | sensitive |
| 1   | fluconazole, 40 µg           | ≤19                                              | 20-28         | ≥29       |
| 2   | nystatin, 80 µg              | <18                                              | -             | ≥18       |
| 3   | itraconazole, 10 µg          | ≤13                                              | 14-18         | ≥19       |
| 4   | clotrimazole, 10 µg          | <12                                              | -             | ≥12       |
| 5   | ketoconazole, 20 µg          | ≤19                                              | 20-25         | ≥26       |
| 6   | amphotericin B, 40 µg        | <14                                              | -             | ≥14       |
